# Supplementary material for: Supramolecular network of a framework material supported by the anion–π linkage of Keggin-type heteropolyoxotungstates: experimental and theoretical insights
Source: Royal Society of Chemistry journal article supplement (doi:10.1039/d0dt03891a), 2021-01-01
Supplement: d0dt03891a1.pdf [file d0dt03891a1.pdf]

## ESI for manuscript:

### Supramolecular network of a framework material supported by the anion- $\pi$ linkage of Keggin-type heteropolyoxotungstates: Experimental and theoretical insights

Maryam Samaniyan,<sup>a</sup> Rosa M. Gomila,<sup>b</sup> Masoud Mirzaei,<sup>\*,a</sup> Hossein Eshtiagh-Hosseini,<sup>a</sup> Nahid Lotfian,<sup>a</sup> Joel T. Mague,<sup>c</sup> Ali Nakhaei Pour<sup>a</sup> and Antonio Frontera<sup>d</sup>

a. Department of Chemistry, Faculty of Science, Ferdowsi University of Mashhad, PO Box 9177948974, Mashhad, Iran, E-mail: mirzaeesh@um.ac.ir

b. Serveis Científic-Tècnics, Universitat de les Illes Balears, Crta de Valldemossa km 7.5, 07122 Palma, Balears, Spain. E-mail: toni.frontera@uib.es.

c. Department of Chemistry, Tulane University, New Orleans, LA, 70118, USA

d. Department of Chemistry, Universitat de les Illes Balears, Crta de Valldemossa km 7.5, 07122 Palma, Balears, Spain. E-mail: [toni.frontera@uib.es](mailto:toni.frontera@uib.es).

IR of compound 1

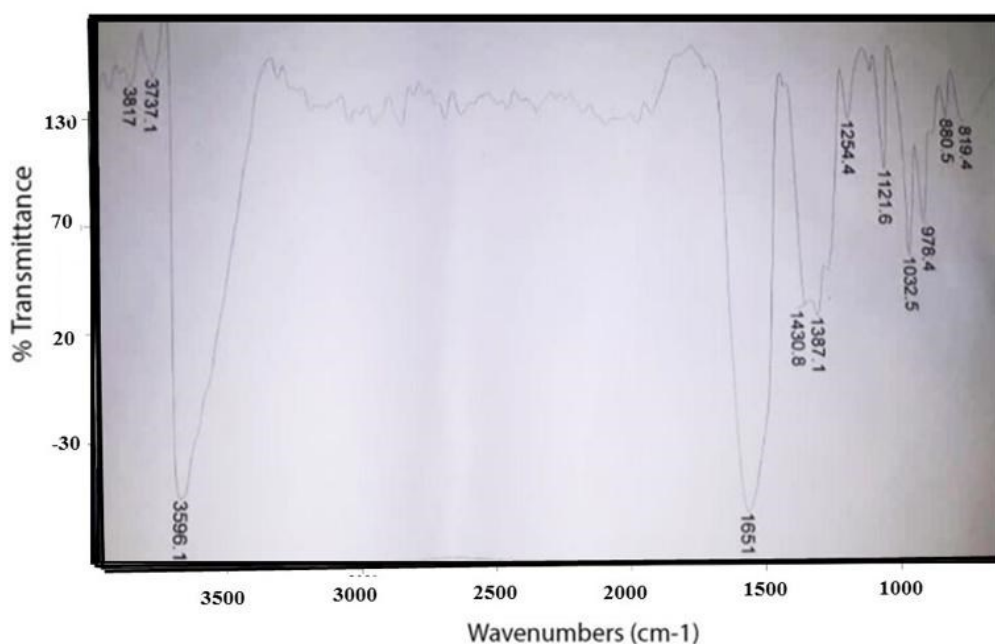

X-ray coordinates of the complexes:

#### 1·HFB

|    |             |             |             |
|----|-------------|-------------|-------------|
| W  | -2.13786603 | -0.08942831 | -0.07876327 |
| Na | 0.00000000  | 0.00000000  | 5.18383674  |
| W  | -2.87501047 | -1.97495141 | -2.73897011 |
| W  | -0.86641080 | -1.73540715 | -5.81507005 |
| W  | 0.45716258  | -3.53368744 | -2.85667659 |
| La | -3.73409587 | -0.76078702 | 3.70023540  |
| Si | 0.00000000  | 0.00000000  | -2.85406352 |
| O  | -2.61789171 | 1.28480743  | 3.79994245  |
| O  | -0.44136452 | 1.86523973  | 3.86894399  |
| O  | 1.33832842  | 5.43884355  | 2.12335599  |

|    |             |             |             |
|----|-------------|-------------|-------------|
| O  | 0.38691959  | 6.80609204  | 0.63496137  |
| O  | -4.06963658 | 4.31813874  | -0.16574625 |
| H  | -4.12484246 | 5.11609411  | -0.42304334 |
| O  | -5.90048720 | -1.23927332 | 4.83263450  |
| H  | -6.17824545 | -0.52423526 | 5.24313687  |
| H  | -5.78867469 | -1.88051179 | 5.40933186  |
| O  | -3.43355758 | -2.78097673 | 5.20682790  |
| H  | -2.93812491 | -3.36931070 | 4.79902539  |
| H  | -4.21159578 | -3.12847314 | 5.38102670  |
| O  | -3.51156254 | -0.13127035 | 6.02843749  |
| H  | -3.04111497 | 0.59869685  | 6.08184047  |
| H  | -3.10671126 | -0.76860561 | 6.46143519  |
| O  | -5.27399531 | 1.10449875  | 3.37554282  |
| H  | -6.02226676 | 0.80887494  | 3.04514148  |
| H  | -4.91899199 | 1.67689550  | 2.82624467  |
| O  | -2.85550923 | -0.13557839 | 1.49413725  |
| O  | -0.65288090 | -1.34633540 | 0.11443193  |
| O  | 0.07909930  | -2.88210462 | -4.57247456 |
| O  | 0.30758428  | -5.22963068 | -3.03178293 |
| O  | -1.52109566 | -0.10650433 | -6.56686370 |
| O  | -3.35560501 | 1.11739269  | -0.94545824 |
| O  | -3.07612164 | -1.57160457 | -0.89116835 |
| O  | -4.07200941 | -3.18002506 | -2.95237407 |
| O  | -3.99018484 | -0.37019282 | -3.06736375 |
| O  | -1.37844217 | -3.00375982 | -2.43597433 |
| O  | -1.44080095 | -2.83402569 | -6.96817374 |
| O  | -2.24839528 | -1.77395454 | -4.52236941 |
| O  | 0.00000000  | 0.00000000  | -4.50346402 |
| O  | -1.52745478 | -0.12099902 | -2.30216340 |
| N  | -0.82557948 | 3.99025893  | 2.32615153  |
| C  | -1.65638882 | 2.01850640  | 3.40064488  |
| C  | -1.82792745 | 3.09702255  | 2.43484877  |
| C  | -2.98420355 | 3.18089661  | 1.61334925  |
| H  | -3.69089860 | 2.55064916  | 1.69474729  |
| C  | -3.04847107 | 4.19779008  | 0.70395285  |
| C  | -1.99239891 | 5.13743477  | 0.63495608  |
| H  | -2.03218034 | 5.86642141  | 0.02655888  |
| C  | -0.91209467 | 4.97662733  | 1.45865539  |
| C  | 0.36712307  | 5.83348542  | 1.39795770  |
| O  | 0.86851533  | -1.26231529 | -2.30216340 |
| O  | 0.65893945  | 1.38331378  | -2.30216340 |
| W  | 1.14637996  | -1.80673178 | -0.07876327 |
| W  | 3.14786325  | -1.50235591 | -2.73897011 |
| W  | 1.93611244  | 0.11736993  | -5.81507005 |
| W  | 2.83168144  | 2.16275800  | -2.85667659 |
| La | 2.52590853  | -2.85342850 | 3.70023540  |
| O  | 0.19627025  | -2.90956416 | 3.79994245  |
| O  | -1.39466252 | -1.31485306 | 3.86894399  |
| O  | -5.37934074 | -1.56039554 | 2.12335599  |
| O  | -6.08770799 | -3.06796384 | 0.63496137  |
| O  | -1.70479954 | -5.68347796 | -0.16574625 |
| H  | -2.36824652 | -6.13026548 | -0.42304334 |
| O  | 4.02348544  | -4.49033513 | 4.83263450  |
| H  | 3.54312373  | -5.08840015 | 5.24313687  |
| H  | 4.52290811  | -4.07288308 | 5.40933186  |
| O  | 4.12517531  | -1.58305967 | 5.20682790  |
| H  | 4.38697147  | -0.85983577 | 4.79902539  |
| H  | 4.81513513  | -2.08311259 | 5.38102670  |
| O  | 1.86946469  | -2.97546683 | 6.02843749  |
| H  | 1.00207121  | -2.93303105 | 6.08184047  |
| H  | 2.21898785  | -2.30618832 | 6.46143519  |
| O  | 1.68047379  | -5.11966341 | 3.37554282  |
| H  | 2.31062706  | -5.61987350 | 3.04514148  |
| H  | 1.00726191  | -5.09841959 | 2.82624467  |
| O  | 1.54516899  | -2.40515399 | 1.49413725  |
| O  | 1.49240102  | 0.10775636  | 0.11443193  |
| O  | 2.45642650  | 1.50955430  | -4.57247456 |
| O  | 4.37520098  | 2.88119126  | -3.03178293 |
| O  | 0.85278290  | -1.26405522 | -6.56686370 |
| O  | 0.71011195  | -3.46473565 | -0.94545824 |
| O  | 2.89911026  | -1.87819717 | -0.89116835 |

|    |             |             |             |
|----|-------------|-------------|-------------|
| O  | 4.78998704  | -1.93645112 | -2.95237407 |
| O  | 2.31568864  | -3.27050484 | -3.06736375 |
| O  | 3.29055325  | 0.30811398  | -2.43597433 |
| O  | 3.17473911  | 0.16924253  | -6.96817374 |
| O  | 2.66048730  | -1.06019021 | -4.52236941 |
| N  | -3.04287608 | -2.71010243 | 2.32615153  |
| C  | -0.91988363 | -2.44372836 | 3.40064488  |
| C  | -1.76813624 | -3.13154290 | 2.43484877  |
| C  | -1.26263544 | -4.17484442 | 1.61334925  |
| H  | -0.36347809 | -4.47173614 | 1.69474729  |
| C  | -2.11115740 | -4.73894896 | 0.70395285  |
| C  | -3.45294981 | -4.29418553 | 0.63495608  |
| H  | -4.06437973 | -4.69313067 | 0.02655888  |
| C  | -3.85383862 | -3.27821125 | 1.45865539  |
| C  | -5.23550825 | -2.59880482 | 1.39795770  |
| W  | 0.99148554  | 1.89616009  | -0.07876327 |
| W  | -0.27285331 | 3.47730784  | -2.73897011 |
| W  | -1.06970112 | 1.61803776  | -5.81507005 |
| W  | -3.28884454 | 1.37092892  | -2.85667659 |
| La | 1.20818680  | 3.61421552  | 3.70023540  |
| O  | 2.42162146  | 1.62475672  | 3.79994245  |
| O  | 1.83602756  | -0.55038667 | 3.86894399  |
| O  | 4.04101232  | -3.87844801 | 2.12335599  |
| O  | 5.70078893  | -3.73812767 | 0.63496137  |
| O  | 5.77443612  | 1.36533922  | -0.16574625 |
| H  | 6.49308898  | 1.01417137  | -0.42304334 |
| O  | 1.87700123  | 5.72960845  | 4.83263450  |
| H  | 2.63512172  | 5.61263541  | 5.24313687  |
| H  | 1.26576658  | 5.95339487  | 5.40933186  |
| O  | -0.69161773 | 4.36403640  | 5.20682790  |
| H  | -1.44884603 | 4.22914647  | 4.79902539  |
| H  | -0.60353935 | 5.21158573  | 5.38102670  |
| O  | 1.64209786  | 3.10673719  | 6.02843749  |
| H  | 2.03904430  | 2.33433473  | 6.08184047  |
| H  | 0.88772394  | 3.07479393  | 6.46143519  |
| O  | 3.59352152  | 4.01516466  | 3.37554282  |
| H  | 3.71163970  | 4.81099855  | 3.04514148  |
| H  | 3.91173008  | 3.42152409  | 2.82624467  |
| O  | 1.31034024  | 2.54073238  | 1.49413725  |
| O  | -0.83952013 | 1.23857904  | 0.11443193  |
| O  | -2.53552580 | 1.37255031  | -4.57247456 |
| O  | -4.68278526 | 2.34843995  | -3.03178293 |
| O  | 0.66831224  | 1.37055955  | -6.56686370 |
| O  | 2.64549307  | 2.34734296  | -0.94545824 |
| O  | 0.17701138  | 3.44980174  | -0.89116835 |
| O  | -0.71797764 | 5.11647618  | -2.95237407 |
| O  | 1.67449621  | 3.64069767  | -3.06736375 |
| O  | -1.91211108 | 2.69564584  | -2.43597433 |
| O  | -1.73393763 | 2.66478316  | -6.96817374 |
| O  | -0.41209202 | 2.83414476  | -4.52236941 |
| N  | 3.86845556  | -1.28015650 | 2.32615153  |
| C  | 2.57627245  | 0.42522144  | 3.40064488  |
| C  | 3.59606368  | 0.03452035  | 2.43484877  |
| C  | 4.24683899  | 0.99394781  | 1.61334925  |
| H  | 4.05437616  | 1.92108698  | 1.69474729  |
| C  | 5.15962846  | 0.54115835  | 0.70395285  |
| C  | 5.44534819  | -0.84324924 | 0.63495608  |
| H  | 6.09656007  | -1.17329074 | 0.02655888  |
| C  | 4.76593329  | -1.69841661 | 1.45865539  |
| C  | 4.86838518  | -3.23468060 | 1.39795770  |
| C  | 1.39301254  | 0.07425997  | -9.76486438 |
| C  | 0.63219483  | 1.24351468  | -9.76486438 |
| C  | -0.76081771 | 1.16925417  | -9.76486438 |
| C  | -1.39301254 | -0.07426050 | -9.76486438 |
| C  | -0.63219536 | -1.24351468 | -9.76486438 |
| C  | 0.76081771  | -1.16925417 | -9.76486438 |
| F  | 1.49709800  | -2.30079865 | -9.76486438 |
| F  | 1.24400099  | 2.44692407  | -9.76486438 |
| F  | -2.74109899 | -0.14612542 | -9.76486438 |
| F  | -1.49709800 | 2.30079812  | -9.76486438 |
| F  | 2.74109846  | 0.14612542  | -9.76486438 |

F

-1.24400099 -2.44692407 -9.76486438

**1·TFT**

|    |             |             |             |
|----|-------------|-------------|-------------|
| W  | -2.13786603 | -0.08942831 | -0.28598220 |
| Na | 0.00000000  | 0.00000000  | 4.97661780  |
| W  | -2.87501047 | -1.97495141 | -2.94618904 |
| W  | -0.86641080 | -1.73540715 | -6.02228898 |
| W  | 0.45716258  | -3.53368744 | -3.06389605 |
| La | -3.73409587 | -0.76078702 | 3.49301594  |
| Si | 0.00000000  | 0.00000000  | -3.06128298 |
| O  | -2.61789171 | 1.28480743  | 3.59272299  |
| O  | -0.44136505 | 1.86523973  | 3.66172453  |
| O  | 1.33832842  | 5.43884355  | 1.91613706  |
| O  | 0.38691959  | 6.80609204  | 0.42774191  |
| O  | -4.06963658 | 4.31813874  | -0.37296571 |
| H  | -4.12484246 | 5.11609411  | -0.63026280 |
| O  | -5.90048720 | -1.23927332 | 4.62541504  |
| H  | -6.17824545 | -0.52423526 | 5.03591794  |
| H  | -5.78867469 | -1.88051179 | 5.20211240  |
| O  | -3.43355758 | -2.78097673 | 4.99960844  |
| H  | -2.93812544 | -3.36931070 | 4.59180646  |
| H  | -4.21159578 | -3.12847314 | 5.17380777  |
| O  | -3.51156254 | -0.13127035 | 5.82121856  |
| H  | -3.04111497 | 0.59869685  | 5.87462101  |
| H  | -3.10671126 | -0.76860561 | 6.25421573  |
| O  | -5.27399584 | 1.10449875  | 3.16832336  |
| H  | -6.02226676 | 0.80887494  | 2.83792255  |
| H  | -4.91899199 | 1.67689550  | 2.61902521  |
| O  | -2.85550923 | -0.13557839 | 1.28691779  |
| O  | -0.65288090 | -1.34633540 | -0.09278753 |
| O  | 0.07909930  | -2.88210462 | -4.77969349 |
| O  | 0.30758428  | -5.22963068 | -3.23900239 |
| O  | -1.52109566 | -0.10650433 | -6.77408316 |
| O  | -3.35560501 | 1.11739269  | -1.15267770 |
| O  | -3.07612164 | -1.57160457 | -1.09838782 |
| O  | -4.07200941 | -3.18002453 | -3.15959353 |
| O  | -3.99018484 | -0.37019282 | -3.27458321 |
| O  | -1.37844217 | -3.00375982 | -2.64319326 |
| O  | -1.44080095 | -2.83402569 | -7.17539320 |
| O  | -2.24839528 | -1.77395454 | -4.72958887 |
| O  | 0.00000000  | 0.00000000  | -4.71068295 |
| O  | -1.52745478 | -0.12099849 | -2.50938286 |
| N  | -0.82557948 | 3.99025893  | 2.11893260  |
| C  | -1.65638882 | 2.01850640  | 3.19342542  |
| C  | -1.82792745 | 3.09702255  | 2.22762931  |
| C  | -2.98420355 | 3.18089661  | 1.40612979  |
| H  | -3.69089860 | 2.55064916  | 1.48752783  |
| C  | -3.04847160 | 4.19779008  | 0.49673392  |
| C  | -1.99239891 | 5.13743477  | 0.42773662  |
| H  | -2.03218034 | 5.86642141  | -0.18066058 |
| C  | -0.91209467 | 4.97662733  | 1.25143593  |
| C  | 0.36712307  | 5.83348542  | 1.19073877  |
| O  | 0.86851533  | -1.26231529 | -2.50938286 |
| O  | 0.65893945  | 1.38331378  | -2.50938286 |
| W  | 1.14637996  | -1.80673178 | -0.28598220 |
| W  | 3.14786325  | -1.50235591 | -2.94618904 |
| W  | 1.93611244  | 0.11736993  | -6.02228898 |
| W  | 2.83168144  | 2.16275800  | -3.06389605 |
| La | 2.52590906  | -2.85342850 | 3.49301594  |
| O  | 0.19627025  | -2.90956416 | 3.59272299  |
| O  | -1.39466252 | -1.31485306 | 3.66172453  |
| O  | -5.37934074 | -1.56039554 | 1.91613706  |
| O  | -6.08770799 | -3.06796384 | 0.42774191  |

|    |             |             |             |
|----|-------------|-------------|-------------|
| O  | -1.70479954 | -5.68347796 | -0.37296571 |
| H  | -2.36824652 | -6.13026548 | -0.63026280 |
| O  | 4.02348597  | -4.49033513 | 4.62541504  |
| H  | 3.54312373  | -5.08840015 | 5.03591794  |
| H  | 4.52290811  | -4.07288308 | 5.20211240  |
| O  | 4.12517531  | -1.58305967 | 4.99960844  |
| H  | 4.38697147  | -0.85983577 | 4.59180646  |
| H  | 4.81513513  | -2.08311259 | 5.17380777  |
| O  | 1.86946469  | -2.97546683 | 5.82121856  |
| H  | 1.00207121  | -2.93303105 | 5.87462101  |
| H  | 2.21898785  | -2.30618832 | 6.25421573  |
| O  | 1.68047379  | -5.11966341 | 3.16832336  |
| H  | 2.31062706  | -5.61987350 | 2.83792255  |
| H  | 1.00726191  | -5.09841959 | 2.61902521  |
| O  | 1.54516899  | -2.40515399 | 1.28691779  |
| O  | 1.49240102  | 0.10775636  | -0.09278753 |
| O  | 2.45642650  | 1.50955430  | -4.77969349 |
| O  | 4.37520098  | 2.88119126  | -3.23900239 |
| O  | 0.85278290  | -1.26405522 | -6.77408316 |
| O  | 0.71011195  | -3.46473565 | -1.15267770 |
| O  | 2.89911026  | -1.87819717 | -1.09838782 |
| O  | 4.78998704  | -1.93645112 | -3.15959353 |
| O  | 2.31568864  | -3.27050484 | -3.27458321 |
| O  | 3.29055325  | 0.30811398  | -2.64319326 |
| O  | 3.17473858  | 0.16924253  | -7.17539320 |
| O  | 2.66048730  | -1.06019021 | -4.72958887 |
| N  | -3.04287608 | -2.71010243 | 2.11893260  |
| C  | -0.91988363 | -2.44372836 | 3.19342542  |
| C  | -1.76813624 | -3.13154290 | 2.22762931  |
| C  | -1.26263544 | -4.17484442 | 1.40612979  |
| H  | -0.36347809 | -4.47173614 | 1.48752783  |
| C  | -2.11115740 | -4.73894896 | 0.49673392  |
| C  | -3.45294981 | -4.29418553 | 0.42773662  |
| H  | -4.06437973 | -4.69313067 | -0.18066058 |
| C  | -3.85383862 | -3.27821125 | 1.25143593  |
| C  | -5.23550825 | -2.59880482 | 1.19073877  |
| W  | 0.99148554  | 1.89616009  | -0.28598220 |
| W  | -0.27285331 | 3.47730784  | -2.94618904 |
| W  | -1.06970112 | 1.61803776  | -6.02228898 |
| W  | -3.28884454 | 1.37092892  | -3.06389605 |
| La | 1.20818680  | 3.61421552  | 3.49301594  |
| O  | 2.42162146  | 1.62475672  | 3.59272299  |
| O  | 1.83602756  | -0.55038667 | 3.66172453  |
| O  | 4.04101232  | -3.87844801 | 1.91613706  |
| O  | 5.70078893  | -3.73812767 | 0.42774191  |
| O  | 5.77443612  | 1.36533922  | -0.37296571 |
| H  | 6.49308898  | 1.01417137  | -0.63026280 |
| O  | 1.87700123  | 5.72960845  | 4.62541504  |
| H  | 2.63512172  | 5.61263541  | 5.03591794  |
| H  | 1.26576658  | 5.95339487  | 5.20211240  |
| O  | -0.69161773 | 4.36403640  | 4.99960844  |
| H  | -1.44884603 | 4.22914647  | 4.59180646  |
| H  | -0.60353935 | 5.21158573  | 5.17380777  |
| O  | 1.64209786  | 3.10673719  | 5.82121856  |
| H  | 2.03904377  | 2.33433473  | 5.87462101  |
| H  | 0.88772394  | 3.07479393  | 6.25421573  |
| O  | 3.59352152  | 4.01516466  | 3.16832336  |
| H  | 3.71163970  | 4.81099855  | 2.83792255  |
| H  | 3.91173008  | 3.42152409  | 2.61902521  |
| O  | 1.31034024  | 2.54073238  | 1.28691779  |
| O  | -0.83952013 | 1.23857904  | -0.09278753 |
| O  | -2.53552580 | 1.37255031  | -4.77969349 |
| O  | -4.68278526 | 2.34843995  | -3.23900239 |

|   |             |             |             |
|---|-------------|-------------|-------------|
| O | 0.66831224  | 1.37055955  | -6.77408316 |
| O | 2.64549307  | 2.34734296  | -1.15267770 |
| O | 0.17701138  | 3.44980174  | -1.09838782 |
| O | -0.71797764 | 5.11647618  | -3.15959353 |
| O | 1.67449621  | 3.64069767  | -3.27458321 |
| O | -1.91211108 | 2.69564584  | -2.64319326 |
| O | -1.73393763 | 2.66478316  | -7.17539320 |
| O | -0.41209202 | 2.83414476  | -4.72958887 |
| N | 3.86845556  | -1.28015650 | 2.11893260  |
| C | 2.57627245  | 0.42522144  | 3.19342542  |
| C | 3.59606368  | 0.03452035  | 2.22762931  |
| C | 4.24683899  | 0.99394781  | 1.40612979  |
| H | 4.05437616  | 1.92108698  | 1.48752783  |
| C | 5.15962846  | 0.54115835  | 0.49673392  |
| C | 5.44534819  | -0.84324924 | 0.42773662  |
| H | 6.09656007  | -1.17329074 | -0.18066058 |
| C | 4.76593329  | -1.69841661 | 1.25143593  |
| C | 4.86838518  | -3.23468060 | 1.19073877  |
| C | 1.14137712  | -0.65897437 | -9.77338361 |
| C | -1.14137765 | -0.65897437 | -9.77338361 |
| C | 0.00000000  | 1.31794928  | -9.77338361 |
| N | 0.00000000  | -1.38414141 | -9.77338361 |
| N | -1.19870183 | 0.69207071  | -9.77338361 |
| N | 1.19870183  | 0.69207071  | -9.77338361 |
| F | 2.31051170  | -1.33397435 | -9.77338361 |
| F | 0.00000000  | 2.66794923  | -9.77338361 |
| F | -2.31051170 | -1.33397435 | -9.77338361 |
